# Supplementary material
Source: ML conference proceedings conference paper supplement (https://proceedings.mlr.press/v37/rajan15.html)
Supplement: Supplementary file [file rajan15-supp.pdf]

---

## Supplementary Materials for Bayesian Multiple Target Localization

---

To support the proof of Theorem 1 and 2, we need to following lemma, which provides an expression for the expected entropy after additional questions. First of all, we introduce some notations. For any pair of random variables  $W, V$ , we define  $H(W||V)$  to be the random variable taking the value

$$-\int_{-\infty}^{\infty} p(w|v) \log p(w|v) dw \quad (1)$$

for each  $V = v$ , assuming the conditional density function  $p(w|v)$  exists. And  $H(W|V)$  is the formal conditional entropy.

In addition, for any random variables  $W, V, U$ , we define  $I(W; V|U)$  to be the random variable taking the value

$$\int_{-\infty}^{\infty} \int_{-\infty}^{\infty} p(w, v|u) \log \frac{p(w, v|u)}{p(w|u)p(v|u)} dv dw, \quad (2)$$

for each  $U = u$ , assuming the conditional density functions exist. And  $I(W; V|U)$  is the formal conditional mutual information.

**Lemma 1.** *Under any policy  $\pi$ , for all  $n \geq 0$ ,*

$$E[H(p_{n+1})|X_{1:n}] = H(p_n) - I(\theta; X_{n+1}|X_{1:n}). \quad (3)$$

Moreover,

$$E[H(p_N)] = H(p_0) - \sum_{n=0}^{N-1} I(\theta; X_{n+1}|X_{1:n}). \quad (4)$$

*Proof.* First of all, we prove the recursive relation (3).  $H(p_n)$  is the entropy of the posterior distribution of  $\theta$ , which is random through its dependence on the past history  $X_{1:n}$ , hence we can rewrite it as  $H(p_n) = H(\theta|X_{1:n})$ . Similarly,  $H(p_{n+1}) = H(\theta|X_{1:n+1}) = H(\theta|X_{1:n}, X_{n+1})$ . Since all three terms in (3) are  $\sigma(X_{1:n})$ -measurable random variables, it suffices to prove (3) holds for any fixed history  $X_{1:n} = x_{1:n}$ , i.e.

$$E[H(\theta|X_{1:n}, X_{n+1})|x_{1:n}] = H(\theta|x_{1:n}) - I(\theta; X_{n+1}|x_{1:n}). \quad (5)$$

Using information theoretic arguments, we have

$$E[H(\theta|X_{1:n}, X_{n+1})|x_{1:n}] \quad (6a)$$

$$= H(\theta|X_{n+1}, x_{1:n}) \quad (6b)$$

$$= H(\theta, X_{n+1}|x_{1:n}) - H(X_{n+1}|x_{1:n}) \quad (6c)$$

$$= H(\theta|x_{1:n}) + H(X_{n+1}|\theta, x_{1:n}) - H(X_{n+1}|x_{1:n}) \quad (6d)$$

$$= H(\theta|x_{1:n}) - I(\theta; X_{n+1}|x_{1:n}) \quad (6e)$$

where (6b) comes from the definition of conditional entropy and (6c), (6d) come from the chain rule for conditional entropy. (6e) holds due to the relationship between entropy and mutual information. This proves (5).

Now, taking the expectation over  $X_{1:n}$  on both sides of (3),

$$E[E[H(p_{n+1})|X_{1:n}]] = E[H(p_n)] - E[H(X_{n+1}|X_{1:n})]. \quad (7)$$

Note that  $E[E[H(p_{n+1})|X_{1:n}]] = E[H(p_{n+1})]$  by the iterated conditioning property of conditional expectation. Moreover,  $E[I(\theta; X_{n+1}|X_{1:n})] = I(\theta; X_{n+1}|X_{1:n})$  according to the definition of conditional entropy in (2). Hence, (7) is equivalent to

$$E[H(p_{n+1})] = E[H(p_n)] - I(\theta; X_{n+1}|X_{1:n}). \quad (8)$$

Applying (8) iteratively for  $n = N - 1, \dots, 0$ , we obtain (4), which concludes the proof.  $\square$

### Proof of Theorem 1

*Proof.* According to Lemma 1, it suffices to prove that  $I(\theta; X_{n+1}|X_{1:n}) \leq C_k \leq \log(k + 1)$  for all  $n \geq 0$  under any valid policy  $\pi$ . Since  $X_{n+1}$  depends on  $\theta$  only through  $Z_{n+1}$ , we have

$$\begin{aligned} I(\theta; X_{n+1}|X_{1:n}) &= I(Z_{n+1}; X_{n+1}|X_{1:n}) \\ &= H(X_{n+1}|X_{1:n}) - H(X_{n+1}|Z_{n+1}, X_{1:n}) \\ &= H(X_{n+1}|X_{1:n}) - H(X_{n+1}|Z_{n+1}). \end{aligned} \quad (9)$$

Also, we have

$$H(X_{n+1}|X_{1:n}) = H\left(\sum_{z=0}^k \pi(z) f(\cdot|z)\right), \quad (10)$$

where  $\pi(z)$  denotes the marginal distribution of  $Z_{n+1}$  and  $f(\cdot|z)$  is the conditional probability density (mass) function of  $X_{n+1}$  given  $Z_{n+1}$ . Moreover,

$$H(X_{n+1}|Z_{n+1}) = \sum_{z=0}^k \pi(z) H(f(\cdot|z)). \quad (11)$$

Substituting (10) and (11) into (9) gives

$$\begin{aligned} I(\theta; X_{n+1}|X_{1:n}) &= H\left(\sum_{z=0}^k \pi(z) f(\cdot|z)\right) - \sum_{z=0}^k \pi(z) H(f(\cdot|z)) \\ &\leq \sup_q H\left(\sum_{z=0}^k q(z) f(\cdot|z)\right) - \sum_{z=0}^k q(z) H(f(\cdot|z)) \\ &= C_k, \end{aligned} \quad (12)$$

where  $q(\cdot)$  is any probability mass function over  $\{0, \dots, k\}$ .

To see the second inequality, we note that the channel capacity  $C_k$  is bounded from above by the capacity of a noiseless channel, i.e.

$$C_k \leq I(Z_{n+1}, Z_{n+1}) = H(Z_{n+1}). \quad (13)$$

Since  $Z_{n+1}$  is a discrete random variable over  $\{0, \dots, k\}$ , the maximum possible value for the entropy  $H(Z_{n+1})$  is obtained when  $X_{n+1}$  has a uniform distribution over  $\{0, \dots, k\}$ . Therefore,  $H(Z_{n+1}) \leq \log(k+1)$ , which completes the proof.  $\square$

## Proof of Theorem 2

*Proof.* We first show that the noiseless answers  $Z_{1:n}$  are iid under the dyadic policy. Let  $U_{i,j}$  be iid Bernoulli(1/2) random variables and let  $V_i$  be iid Uniform(0,  $2^{-N-1}$ ). Then  $T_i := \sum_{j=1}^N 2^{-j} U_{i,j} + V_i$  are iid Uniform(0, 1). By the inversion method for simulation,  $Q(T_i) = F_0^{-1}(T_i)$  provides a random variable that has cdf  $F_0$ , and so is equal in distribution to  $\theta_i$ . Because  $T_i$  is independent across  $i$ , and  $\theta_i$  is independent across  $i$ , the vector  $(Q(T_i) : i = 1, \dots, k)$  is equal in distribution to  $\theta$ . Each  $Z_n$ , considered as a function of  $\theta$ , is equal in distribution to  $U_{1,n} + \dots + U_{k,n}$ . Moreover, the vector  $(Z_n : n = 1, \dots, N)$  is equal in distribution to the vector  $(U_{1,n} + \dots + U_{k,n} : n = 1, \dots, N)$ , which is iid across  $n$ . Thus,  $Z_{1:N}$  are iid.

Now, according to Lemma 1, it suffices to prove that under the dyadic policy,  $I(\theta; X_{n+1}|X_{1:n}) = D_k$  for all  $n \geq 0$ . Under the dyadic policy, the noiseless answer  $Z_{n+1} \sim \text{Bin}(k, \frac{1}{2})$  and is independent of the previous history  $X_{1:n}$  (this is a consequence of the independence of  $Z_{n+1}$  from  $Z_{1:n}$  shown above). Hence, the marginal distribution function of  $Z_{n+1}$  is  $\pi(z) = \binom{k}{z} \frac{1}{2^k}$ . The remainder of the proof is similar to the proof of Theorem 1.  $\square$

To support the proof of Theorem 3, we introduce here some additional notation and derive an explicit formula for the posterior distribution after observing noiseless answers.

Consider a fixed  $n$ , where  $1 \leq n \leq N$ . For each binary sequence  $s = \{s_1, \dots, s_n\}$ , define

$$C_s = \left( \bigcap_{1 \leq j \leq n; s_j=1} A_j \right) \cap \left( \bigcap_{1 \leq j \leq n; s_j=0} A_j^c \right) \cap \text{supp}(f_0). \quad (14)$$

The collection  $\{C_s : C_s \neq \emptyset, s \in \{0, 1\}^n\}$  provides a partition of the support of  $f_0$ . A history of  $n$  questions provides information on which sets  $C_s$  contain which targets among  $\theta_{1:k}$ .

We will think of a sequence of binary sequences  $s^{(1)}, \dots, s^{(k)}$  as a sequence of codewords indicating the sets in which each of the targets  $\theta_{1:k}$  reside, i.e. indicating that  $\theta_1$  is in  $C_{s^{(1)}}$ ,  $\theta_2$  is in  $C_{s^{(2)}}$ , etc. We may consider each binary sequence  $s^{(1)}, \dots, s^{(k)}$  to be a column vector, and place them into an  $n \times k$  binary matrix,  $\mathcal{S}$ . This binary matrix then codes the location of all  $k$  targets, and is a codeword for their joint location.

Moreover, to characterize the location of the random vector  $\theta = (\theta_{1:k})$  in terms of its codeword  $\mathcal{S}$ , define  $C_{\mathcal{S}} \subset \mathbb{R}^k$  to be the Cartesian product

$$C_{\mathcal{S}} = C_{s^{(1)}} \times \dots \times C_{s^{(k)}}. \quad (15)$$

To be consistent with a noiseless answer  $Z_j$ , we must have exactly  $Z_j$  targets located in the question set  $A_j$  for each  $1 \leq j \leq n$ . This can be described in terms of a constraint on the matrix  $\mathcal{S}$  as  $s_j^{(1)} + \dots + s_j^{(k)} = Z_j$ , i.e., that the sum of the  $j^{\text{th}}$  row in the matrix  $\mathcal{S}$  is  $Z_j$ . Thus, the set of all possible joint codewords that are consistent with  $\{Z_{1:n} = z_{1:n}\}$  describing  $\theta_{1:k}$  is

$$\begin{aligned} E_n = \{ \mathcal{S} | s^{(1)}, \dots, s^{(k)} \in \{0, 1\}^n, C_{s^{(1)}}, \dots, C_{s^{(k)}} \neq \emptyset, \\ s_j^{(1)} + \dots + s_j^{(k)} = z_j, \text{ for all } 1 \leq j \leq n \}. \end{aligned} \quad (16)$$

Now, we present the explicit characterization of the posterior distribution in the following lemma.

**Lemma 2.** *The posterior distribution given a sequence of noiseless answers  $Z_{1:n} = z_{1:n}$  is*

$$p_n(u_{1:k}) = \frac{p_0(u_{1:k})}{p_0\left(\bigcup_{\mathcal{S} \in E_n} C_{\mathcal{S}}\right)}, \text{ for } u_{1:k} \in \bigcup_{\mathcal{S} \in E_n} C_{\mathcal{S}}, \quad (17)$$

where for a measurable set  $A$ ,  $p_0(A)$  denotes the integral  $\int_A p_0(u_{1:k}) du_{1:k}$ . Moreover,

$$p_0\left(\bigcup_{\mathcal{S} \in E_n} C_{\mathcal{S}}\right) = \sum_{\mathcal{S} \in E_n} f_0(C_{s^{(1)}}) \dots f_0(C_{s^{(k)}}), \quad (18)$$

155  
160  
165  
170  
175  
180  
185  
190  
195  
200  
205  
210  
215  
220  
225  
230  
235  
240  
245  
250  
255  
260  
265  
270  
275  
280  
285  
290  
295  
300  
305  
310  
315  
320  
325  
330  
335  
340  
345  
350  
355  
360  
365  
370  
375  
380  
385  
390  
395  
400  
405  
410  
415  
420  
425  
430  
435  
440  
445  
450  
455  
460  
465  
470  
475  
480  
485  
490  
495  
500  
505  
510  
515  
520  
525  
530  
535  
540  
545  
550  
555  
560  
565  
570  
575  
580  
585  
590  
595  
600  
605  
610  
615  
620  
625  
630  
635  
640  
645  
650  
655  
660  
665  
670  
675  
680  
685  
690  
695  
700  
705  
710  
715  
720  
725  
730  
735  
740  
745  
750  
755  
760  
765  
770  
775  
780  
785  
790  
795  
800  
805  
810  
815  
820  
825  
830  
835  
840  
845  
850  
855  
860  
865  
870  
875  
880  
885  
890  
895  
900  
905  
910  
915  
920  
925  
930  
935  
940  
945  
950  
955  
960  
965  
970  
975  
980  
985  
990  
995

where  $f_0(C_{s^{(i)}})$  denotes the integral  $\int_{C_{s^{(i)}}} f_0(u) du$ .

### Proof of Theorem 3

*Proof.* First, we prove the result for noiseless answers. Under the dyadic policy, we partition  $(0, 1]$  into  $2^N$  subintervals at time  $N$ . Now let's consider the event  $\{\theta_i \in C | Z_{1:N} = z_{1:N}\}$ , where  $C$  is one of such subintervals.

Let's denote the support of the posterior distribution  $p_N(u_{1:k})$  by  $D = \bigcup_{\mathcal{S} \in E_N} C_{\mathcal{S}}$ . Moreover, denote the collection of matrices  $\mathcal{S} \in E_N$  that are consistent with the event  $\{\theta_i \in C | Z_{1:N} = z_{1:N}\}$  by  $E_N(C)$ . Note that  $p_0(C_{\mathcal{S}}) = f_0(C_{s^{(1)}})f_0(C_{s^{(2)}}) \dots f_0(C_{s^{(k)}}) = 2^{-Nk}$  under the dyadic policy. For simplicity, define  $D_C = \bigcup_{\mathcal{S} \in E_N(C)} C_{\mathcal{S}}$ . Therefore, using Lemma 2, we can compute the probability of  $P(\theta_1 \in C | Z_{1:N} = z_{1:N})$  as

$$\begin{aligned} P(\theta_1 \in C | Z_{1:N} = z_{1:N}) &= \int_{u_{1:k} \in D_C} p_N(u_{1:k}) du_{1:k} \\ &= \int_{u_{1:k} \in D_C} \frac{p_0(u_{1:k})}{\sum_{\mathcal{S} \in E_N} f_0(C_{s^{(1)}})f_0(C_{s^{(2)}}) \dots f_0(C_{s^{(k)}})} du_{1:k} \\ &= \sum_{\mathcal{S} \in E_N(C)} \frac{1}{2^{Nk} |E_N|} \int_{u_{1:k} \in C_{\mathcal{S}}} p_0(u_{1:k}) du_{1:k} \\ &= \frac{|E_N(C)|}{|E_N|}, \end{aligned} \quad (19)$$

where  $|E_N(C)|, |E_N|$  denote the cardinalities of  $E_N(C), E_N$ , respectively. Consider the construction of the  $N \times k$  binary matrix  $\mathcal{S} \in E_N$ . The only requirement it needs to satisfy is that the sum of  $n$ th row is equal to  $z_n$ . Hence, we can construct the matrix row by row. Note that in step  $n$ , there are  $\binom{k}{z_n}$  ways to specify the nonzero entries in the  $n$ th row, for  $n = 1, 2, \dots, N$ . Thus, by the product rule,

$$|E_N| = \prod_{n=1}^N \binom{k}{z_n}. \quad (20)$$

Using combinatorial techniques, we have

$$|E_N(C)| = \prod_{n=1}^N \binom{k-1}{z_n - s_n} 1_{\{0 \leq z_n - s_n \leq k-1\}}. \quad (21)$$

Combining (19), (20) and (21) together and using the fact

that  $\theta_1, \theta_2, \dots, \theta_k$  are exchangeable,

$$\begin{aligned} P(\theta_i \in C | Z_{1:N} = z_{1:N}) &= \frac{\prod_{n=1}^N \binom{k-1}{z_n - s_n} 1_{\{0 \leq z_n - s_n \leq k-1\}}}{\prod_{n=1}^N \binom{k}{z_n}} \\ &= \prod_{n=1}^N \begin{cases} \frac{z_n}{k}, & \text{if } s_n = 1 \\ 1 - \frac{z_n}{k}, & \text{if } s_n = 0 \end{cases}, \end{aligned} \quad (22)$$

for  $i = 1, 2, \dots, k$ .

Equivalently,

$$P(\theta_i \in C | Z_{1:N} = z_{1:N}) = \prod_{n=1}^N \left( \frac{z_n}{k} \right)^{s_n} \left( 1 - \frac{z_n}{k} \right)^{1-s_n}. \quad (23)$$

Now we extend this result to the case with noisy answers. Firstly, we have

$$\begin{aligned} P(\theta_i \in C | x_{1:N}) &= \sum_{z_{1:N}} P(\theta_i \in C, z_{1:N} | x_{1:N}) \\ &= \sum_{z_{1:N}} P(\theta_i \in C | z_{1:N}, x_{1:N}) P(z_{1:N} | x_{1:N}) \\ &= \sum_{z_{1:N}} P(\theta_i \in C | z_{1:N}) P(z_{1:N} | x_{1:N}). \end{aligned} \quad (24)$$

Under the dyadic policy,  $Z_1, \dots, Z_N$  are conditionally independent given the noisy observations  $x_1, \dots, x_N$ . Thus,  $P(z_{1:N} | x_{1:N}) = \prod_{n=1}^N P(z_n | x_{1:N})$ . Moreover, due to the special structure of the dyadic policy,  $Z_n$  is independent of  $Z_j$  for all  $j \neq n, j = 1, \dots, N$ , thus implying  $Z_n$  is independent of  $X_j$  for all  $j \neq n, j = 1, \dots, N$ . Hence,  $P(z_n | x_{1:N}) = P(z_n | x_n)$ . Therefore,  $P(z_{1:N} | x_{1:N}) = \prod_{n=1}^N P(z_n | x_n)$ . According to (23), we have

$$\begin{aligned} P(\theta_i \in C | x_{1:N}) &= \sum_{z_{1:N}} \left( \prod_{n=1}^N \left( \frac{z_n}{k} \right)^{s_n} \left( 1 - \frac{z_n}{k} \right)^{1-s_n} \right) P(z_{1:N} | x_{1:N}) \\ &= \sum_{z_{1:N}} \prod_{n=1}^N \left( \frac{z_n}{k} \right)^{s_n} \left( 1 - \frac{z_n}{k} \right)^{1-s_n} \prod_{n=1}^N P(z_n | x_n) \\ &= \sum_{z_{1:N}} \left( \prod_{n=1}^N \left( \frac{z_n}{k} \right)^{s_n} \left( 1 - \frac{z_n}{k} \right)^{1-s_n} P(z_n | x_n) \right) \\ &= \prod_{n=1}^N \left( \sum_{z_n=0}^K \left( \frac{z_n}{k} \right)^{s_n} \left( 1 - \frac{z_n}{k} \right)^{1-s_n} P(z_n | x_n) \right). \end{aligned} \quad (25)$$

275  
276  
277  
278  
279  
280  
281  
282  
283  
284  
285  
286  
287  
288  
289  
290  
291  
292  
293  
294  
295  
296  
297  
298  
299  
300  
301  
302  
303  
304  
305  
306  
307  
308  
309  
310  
311  
312  
313  
314  
315  
316  
317  
318  
319  
320  
321  
322  
323  
324  
325  
326  
327  
328  
329

Furthermore, according to the definition of  $e_n$ , we have

$$\begin{aligned}
 & \sum_{z_n=0}^K \left(\frac{z_n}{k}\right)^{s_n} \left(1 - \frac{z_n}{k}\right)^{1-s_n} P(z_n|x_n) \\
 &= \begin{cases} \sum_{z_n=0}^K \frac{z_n}{k} P(z_n|x_n) = \frac{e_n}{k}, & \text{if } s_n = 1, \\ \sum_{z_n=0}^K \left(1 - \frac{z_n}{k}\right) P(z_n|x_n) = 1 - \frac{e_n}{k}, & \text{if } s_n = 0. \end{cases} \\
 &= \left(\frac{e_n}{k}\right)^{s_n} \left(1 - \frac{e_n}{k}\right)^{1-s_n}
 \end{aligned} \tag{26}$$

Substituting (26) into (25) proves the first claim in Theorem 3.

Finally,

$$E[N(C)|x_{1:N}] = \sum_{i=1}^k P(\theta_i \in C|x_{1:N}) = kP(\theta_i \in C|x_{1:N}), \tag{27}$$

and we complete the proof.  $\square$

Now, we prove the claim made in Section 4 regarding the approximation ratio in the noiseless case.

**Lemma 3.**  $H(\text{Bin}(k, \frac{1}{2}))/\log(k+1) \geq \frac{1}{2}$ .

*Proof.*  $H(\text{Bin}(k, \frac{1}{2})) = H(\sum_{i=1}^k B_i)$ , where  $B_i$  are iid Bernoulli( $\frac{1}{2}$ ). By Theorem 1 in (?), (but expressing entropy in base 2 instead of base  $e$ ),

$$2^{2H(\text{Bin}(k, \frac{1}{2}))} \geq k2^{2H(B_1)} = 4k.$$

This implies that  $H(\text{Bin}(k, \frac{1}{2})) \geq \frac{1}{2} \log(4k)$  and

$$\frac{H(\text{Bin}(k, \frac{1}{2}))}{\log(k+1)} \geq \frac{1}{2} \frac{\log(4k)}{\log(k+1)} \geq \frac{1}{2}.$$

$\square$

## Detailed implementation of the EP Algorithm

A detailed implementation of the Entropy Pursuit (EP) algorithm is presented below.

---

### Algorithm 1 Implementation of EP

---

- 1: Obtain noisy observations  $x_1, \dots, x_N$ .
  - 2: Generate  $E_N$ .
  - 3: Create matrix  $D$  with dimension  $2^N \times |E_N|$ . Each row in  $D$  corresponds to one pixel  $C$ , each element in the row represents the number of instances in  $C$  as per each  $S \in E_N$ .
  - 4: **for**  $S_i \in E_N$  **do**
  - 5:     Update *Column*  $i$  of  $D$  with the number of instances at each pixel  $C$  as per  $S_i$ ;
  - 6: **end for**
  - 7:  $m = 0, D^{(0)} = D, E_N^{(0)} = E_N$ .
  - 8: **repeat**
  - 9:     **for** each pixel  $C$  **do**
  - 10:         For each  $u = 0, \dots, k$ , evaluate
 
$$\begin{aligned}
 & P(N(C) = u|x_{1:n}) \\
 &= \frac{|\{S \in E_N^{(m)} : \text{codes for } C \text{ appear } u \text{ times in } S\}|}{|E_N^{(m)}|};
 \end{aligned} \tag{28}$$
  - 11:         Evaluate
 
$$\begin{aligned}
 & H(N(C)|x_{1:n}) \\
 &= - \sum_{u=0}^k P(N(C) = u|x_{1:n}) \log(P(N(C) = u|x_{1:n}));
 \end{aligned} \tag{29}$$
  - 12:     **end for**
  - 13:      $C^* = \arg \max_C H(N(C)|x_{1:n})$ ;
  - 14:     Query the oracle and obtain  $\text{Answer}_{C^*}^{(m)} = \text{Oracle}(C^*)$ ;
  - 15:     **for**  $S_i \in E_N^{(m)}$  **do**
  - 16:         **if**  $S_i$  is incompatible with  $\text{Answer}_{C^*}^{(m)}$  **then**
  - 17:             Remove  $S_i$  from  $E_N^{(m)}$ ;
  - 18:             Remove *Column*  $i$  from  $D^{(m)}$ ;
  - 19:         **end if**
  - 20:     **end for**
  - 21:      $m=m+1$ ;
  - 22: **until**  $H(O_{C^*}|x_{1:n}) = 0$
  - 23: The unique columns of  $D^{(m)}$  give the estimated instances joint location.
- 

330  
331  
332  
333  
334  
335  
336  
337  
338  
339  
340  
341  
342  
343  
344  
345  
346  
347  
348  
349  
350  
351  
352  
353  
354  
355  
356  
357  
358  
359  
360  
361  
362  
363  
364  
365  
366  
367  
368  
369  
370  
371  
372  
373  
374  
375  
376  
377  
378  
379  
380  
381  
382  
383  
384

385  
386  
387  
388  
389  
390  
391  
392  
393  
394  
395  
396  
397  
398  
399  
400  
401  
402  
403  
404  
405  
406  
407  
408  
409  
410  
411  
412  
413  
414  
415  
416  
417  
418  
419  
420  
421  
422  
423  
424  
425  
426  
427  
428  
429  
430  
431  
432  
433  
434  
435  
436  
437  
438  
439
